# Supplementary material
Source: Research Square preprint supplement (doi:10.21203/rs.3.rs-9573175/v1)
Supplement: Supplementary file 1 [file 44c14757e4114d1e56436118.docx]

**Appendix: Variable Definition**

| *Variable* | *Definition* |
| --- | --- |
| Advertisement | An indicator equal to 1 if the host university placed promotional content (e.g., university development updates, disciplinary achievements, or faculty/postdoctoral recruitment ads) in the partner journal during event years t-3 to t-1, and 0 otherwise. |
| Alumni | An indicator equal to 1 if any author has an alumni connection with the editor-in-chief, director, or other senior editors (e.g., editorial office heads) of the partner journals, and 0 otherwise. |
| Author# | The natural logarithm of the number of authors of the submitted paper plus one. |
| Author_paper# | The natural logarithm of the total number of papers published by the authors of the submitted paper plus one. |
| Author_referee | An indicator equal to 1 if any author of the submitted paper serves as a reviewer for the partner journals, and 0 otherwise. |
| Cites | The citation count of a given paper as of December 31, 2025. |
| Conference_journal# | The natural logarithm of the number of partner journals of the academic conference plus one. |
| Conference_paper# | The natural logarithm of the number of papers presented at the conferences plus one. |
| Day_time | The natural logarithm of the duration of the conference in days plus one. |
| Dean | An indicator equal to 1 if any author holds a senior university administrative leadership position (e.g., President, Vice President, Dean, Vice Dean, or an equivalent role), and 0 otherwise. |
| Editor_board | An indicator equal to 1 if any author of the conference paper serves on the editorial board of the partner journal, and 0 otherwise. |
| Editor_speech | An indicator equal to 1 if editorial leadership from the conference’s affiliated journal(s) (e.g., the editor-in-chief, director, or other senior editors) delivered a keynote address or formal remarks at the event, and 0 otherwise. |
| Elite_author | An indicator equal to 1 if any author holds a distinguished title (e.g., *Academician*, *Changjiang Scholar*, or a *National Ten Thousand Talents Plan awardee*), and 0 otherwise. |
| Host | An indicator equal to 1 if any author of a conference paper is affiliated with the conference’s host institution, and 0 otherwise. |
| Host_Published | An indicator equal to 1 for papers that (i) are presented at a journal-university joint conference, (ii) have at least one author affiliated with the host university, and (iii) are subsequently published in the partner journal, and 0 otherwise. |
| Journal_paper | The natural logarithm of the number of papers published by the authors of the submitted paper in partner journals plus one. |
| Published | An indicator equal to 1 if a paper presented at a journal-university joint conference is subsequently published in the partner journal, and 0 otherwise. |
| Top_Journal | An indicator equal to 1 if the conference is co-organized with at least one top-tier Chinese journal (e.g., *Social Sciences in China*, *Economic Research Journal*, or *Management World*), and 0 otherwise. |
| Top_university | An indicator equal to 1 if the conference host institution is a “985 Project” university, and 0 otherwise. |
